# Supplementary material for: Leaderless Transcripts and Small Proteins Are Common Features of the Mycobacterial Translational Landscape
Source: PubMed Central journal article supplement (PMC4633059; doi:10.1371/journal.pgen.1005641), 2015-11-04

Supporting Information Figure S5

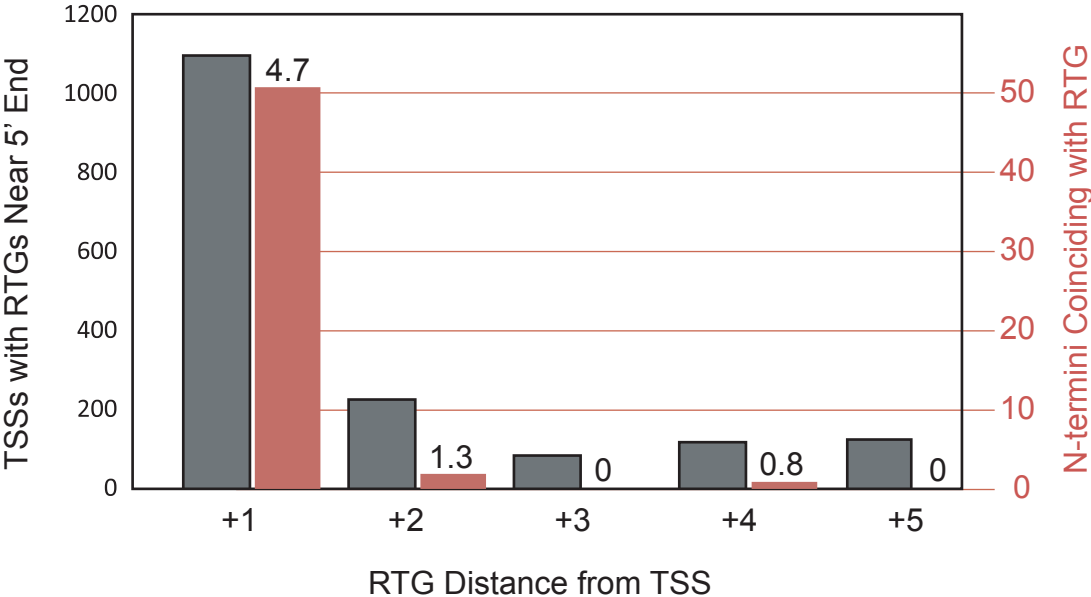

Supplement: pgen.1005641.s005.pdf [file pgen.1005641.s005.pdf]
