# Supplementary material for: Leaderless Transcripts and Small Proteins Are Common Features of the Mycobacterial Translational Landscape
Source: PLOS journal article supplement (doi:10.1371/journal.pgen.1005641), 2015-11-04

Supporting Information Figure S4

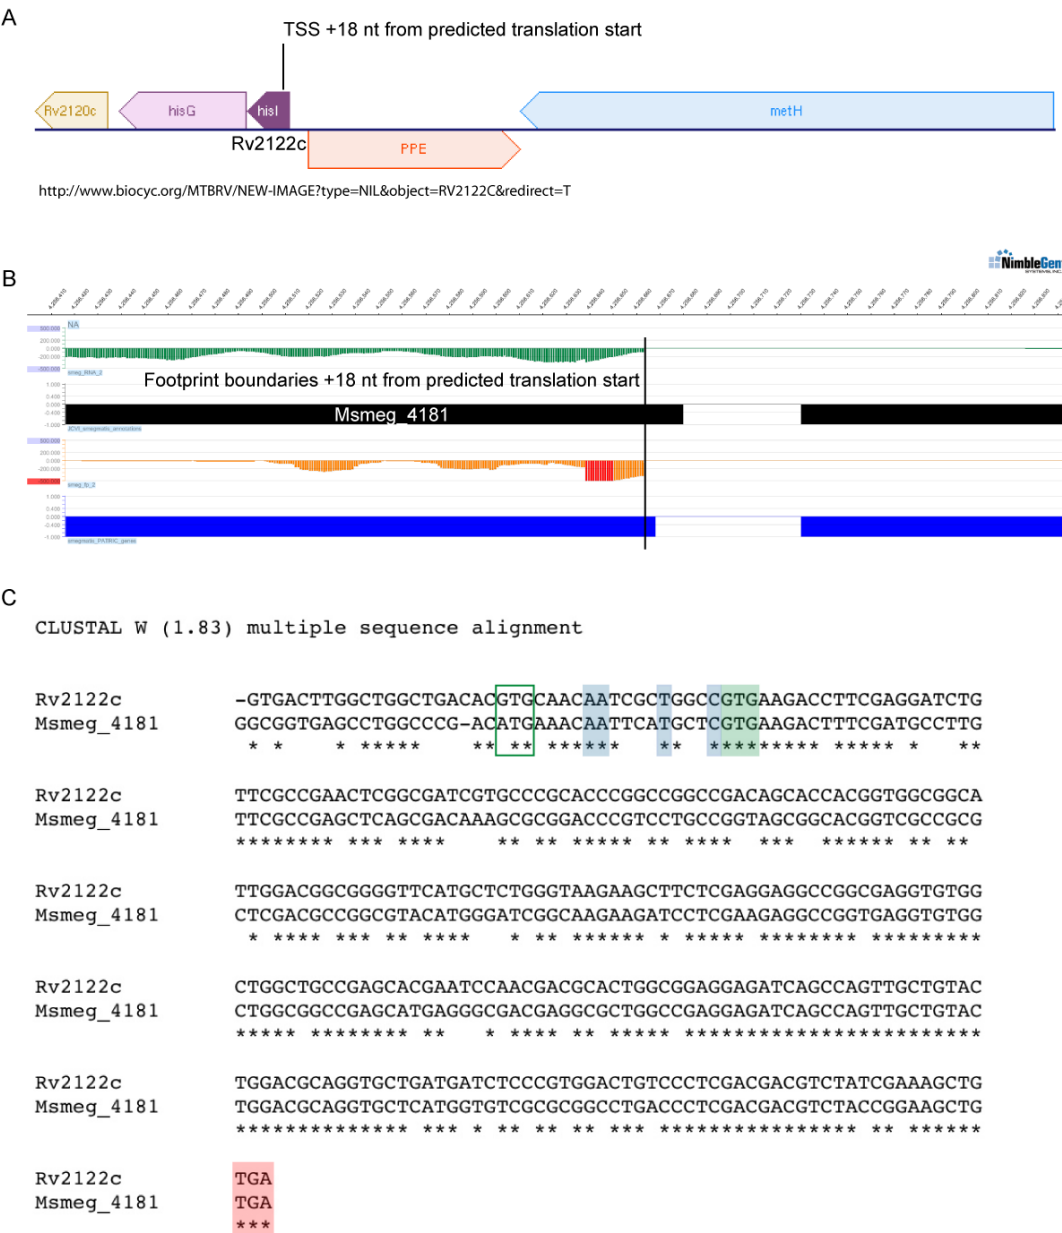

Supplement: S4 (10.1371/journal.pgen.1005641.s004) [file journal.pgen.1005641.s004]
