# Supplementary material for: Leaderless Transcripts and Small Proteins Are Common Features of the Mycobacterial Translational Landscape
Source: PLoS Genet. 2015 Nov 4;11(11):e1005641. doi: 10.1371/journal.pgen.1005641 (PMC4633059; doi:10.1371/journal.pgen.1005641)
Supplement: S4 Table — (XLSX) [file pgen.1005641.s011.xlsx]

## Sheet: acetyl or non-ATG met
orf	Unique identifier for strand/coord combo	strand	observed_orf	parent_orf	Coded aa	iCodon	Genome coordinate 1st nt of start codon	Observed start relative to annotated start	Position of start site relative to length of gene	Does start codon map exactly to a TSS?	Leaderless start
Rv3287c	3669457-	-	TDQLEDQTQGGSTVDR	MTDQLEDQTQGGSTVDRSLPGGCMADSDLPTK	M	ATG	3669457	-69	-0.157895	no
Rv0969	1078677+	+	TTDVLSDTDVSLK	MTTDVLSDTDVSLKVVSNASGR	M	ATG	1078677	-66	-0.0285467	no
Rv0046c	51124-	-	SEHQSLPAPEASTEVR	MSEHQSLPAPEASTEVRVAIVGVGNCASSLVQGVEYYYNADDTSTVPGLMHVR	M	ATG	51124	0	0	no
Rv0092	100583+	+	TTAVTGEHHASVQR	MTTAVTGEHHASVQRIQLR	M	ATG	100583	0	0	no
Rv0190	221871+	+	TAAHGYTQQK	MTAAHGYTQQKDNYAK	M	ATG	221871	0	0	no
Rv0222	265507+	+	SSESDAANTEPEVLVEQR	MSSESDAANTEPEVLVEQRDR	M	ATG	265507	0	0	no
Rv0287	351525+	+	SLLDAHIPQLVASQSAFAAK	MSLLDAHIPQLVASQSAFAAKAGLMR	M	ATG	351525	0	0	no
Rv0348	418293+	+	TISFSSSNLR	MTISFSSSNLRDDATSGNGDYR	M	ATG	418293	0	0	no
Rv0361	438822+	+	SNAPEPDRSAGESGSEPAGER	MSNAPEPDRSAGESGSEPAGER	M	ATG	438822	0	0	no
Rv0392c	472639-	-	TLSSGEPSAVGGR	MTLSSGEPSAVGGRHR	M	ATG	472639	0	0	no
Rv0444c	533789-	-	TEHTDFELLELATPYALNAVSDDER	MTEHTDFELLELATPYALNAVSDDERADIDR	M	ATG	533789	0	0	no
Rv0470c	561711-	-	SVQLTPHFGNVQAHYDLSDDFFR	MSVQLTPHFGNVQAHYDLSDDFFRLFLDPTQTYSCAYFER	M	ATG	561711	0	0	no
Rv0497	587377+	+	TGPHPETESSGNR	MTGPHPETESSGNRQISVAELLAR	M	ATG	587377	0	0	no
Rv0625c	717893-	-	STHNDSAPTSR	MSTHNDSAPTSRR	M	ATG	717893	0	0	no
Rv0673	773123+	+	THAIRPVDFDNLK	MTHAIRPVDFDNLK	M	ATG	773123	0	0	no
Rv0721	814328+	+	AEQPAGQAGTTDNRDAR	MAEQPAGQAGTTDNRDAR	M	ATG	814328	0	0	no
Rv0760c	854686-	-	TQTTQSPALIASQSSWR	MTQTTQSPALIASQSSWRCVQAHDR	M	ATG	854686	0	0	no
Rv0794c	888636-	-	TAAQQDQAPMATPGCR	MTAAQQDQAPMATPGCREGETYDVVVLGAGPVGQNVADR	M	ATG	888636	0	0	no
Rv0873	970505+	+	AQQTQVTEEQAR	MAQQTQVTEEQARALAEESR	M	ATG	970505	0	0	no
Rv0879c	978756-	-	SVENSQIR	MSVENSQIREPPPLPPVLLEVWPVIAVGALAWLVAAVAAFVVPGLASWR	M	ATG	978756	0	0	no	LL +4
Rv0993	1109272+	+	SRPEVLTPFTAIVPAAGLGTR	MSRPEVLTPFTAIVPAAGLGTR	M	ATG	1109272	0	0	no	LL +2
Rv1080c	1205798-	-	TDTQVTWLTQESHDR	MTDTQVTWLTQESHDRLK	M	ATG	1205798	0	0	no
Rv1085c	1210484-	-	SGQADTATTAEAR	MSGQADTATTAEARTPAHAAHHLVEGVAR	M	ATG	1210484	0	0	no
Rv1098c	1227565-	-	AVDADSANYR	MAVDADSANYRIEHDTMGEVR	M	ATG	1227565	0	0	no
Rv1295	1450697+	+	TVPPTATHQPWPGVIAAYR	MTVPPTATHQPWPGVIAAYRDR	M	ATG	1450697	0	0	no
Rv1347c	1512605-	-	TKPTSAGQADDALVR	MTKPTSAGQADDALVR	M	ATG	1512605	0	0	no
Rv1464	1651518+	+	TASVNSLDLAAIR	MTASVNSLDLAAIRADFPILK	M	ATG	1651518	0	0	no
Rv1479	1669283+	+	TSAGGFPAGAGGYQTPGGH	MTSAGGFPAGAGGYQTPGGHSASPAHEAPPGGAEGLAAEVHTLERAIFEVK	M	ATG	1669283	0	0	no
Rv1532c	1733550-	-	SDPLTAQEQHK	MSDPLTAQEQHKR	M	ATG	1733550	0	0	no
Rv1762c	1995842-	-	MQSSSLDPVASER	MQSSSLDPVASERLSHAEK	M	ATG	1995842	0	0	no
Rv1875	2124381+	+	TTLNEAAALAAAER	MTTLNEAAALAAAERGLAVVSTVR	M	ATG	2124381	0	0	no
Rv1957	2202584+	+	TDRTDADDLDLQR	MTDRTDADDLDLQR	M	ATG	2202584	0	0	no
Rv2151c	2410641-	-	TEHNEDPQIER	MTEHNEDPQIERVADDAADEEAVTEPLATESK	M	ATG	2410641	0	0	no
Rv2174	2435909+	+	TTPSHAPAVDLATAK	MTTPSHAPAVDLATAKDAVVQHLSR	M	ATG	2435909	0	0	no
Rv2198c	2463047-	-	SGPNPPGREPDEPESEPVSDTGDER	MSGPNPPGREPDEPESEPVSDTGDER	M	ATG	2463047	0	0	no
Rv2204c	2469287-	-	TVQNEPSAK	MTVQNEPSAKTHGVILTEAAAAK	M	ATG	2469287	0	0	no
Rv2247	2520743+	+	TIMAPEAVGESLDPR	MTIMAPEAVGESLDPRDPLLR	M	ATG	2520743	0	0	no
Rv2258c	2531897-	-	SGALETTEEFGNR	MSGALETTEEFGNRFVAAIDSAGLAILVSVGHQTGLLDTMAGLPPATSMEIAEAAGLEER	M	ATG	2531897	0	0	no
Rv2575	2899339+	+	TFNEGVQIDTSTTSTSGSGGGR	MTFNEGVQIDTSTTSTSGSGGGRR	M	ATG	2899339	0	0	no
Rv2606c	2934070-	-	MDPAGNPATGTAR	MDPAGNPATGTARVK	M	ATG	2934070	0	0	no
Rv2614c	2943267-	-	SAPAQPAPGVDGGDPSQAR	MSAPAQPAPGVDGGDPSQARIR	M	ATG	2943267	0	0	no
Rv2650c	2975234-	-	TNEQHFADDGDIK	MTNEQHFADDGDIKQLSLDETR	M	ATG	2975234	0	0	no
Rv2702	3016858+	+	TSTGPETSETPGATTQR	MTSTGPETSETPGATTQRHGFGIDVGGSGIK	M	ATG	3016858	0	0	no
Rv2844	3150713+	+	TSSEPAHGATPK	MTSSEPAHGATPKR	M	ATG	3150713	0	0	no
Rv2893	3202420+	+	TVASTAHHTR	MTVASTAHHTRR	M	ATG	3202420	0	0	no
Rv3075c	3438973-	-	TSMYEQVDTNTADPVAGSR	MTSMYEQVDTNTADPVAGSRIDPVLAR	M	ATG	3438973	0	0	no
Rv3132c	3499265-	-	TTGGLVDENDGAAMRPLR	MTTGGLVDENDGAAMRPLR	M	ATG	3499265	0	0	no
Rv3340	3726127+	+	SADSNSTDADPTAHWSFETK	MSADSNSTDADPTAHWSFETKQIHAGQHPDPTTNAR	M	ATG	3726127	0	0	no
Rv3442c	3861950-	-	TETTPAPQTPAAPAGPAQSFVLER	MTETTPAPQTPAAPAGPAQSFVLERPIQTVGR	M	ATG	3861950	0	0	no
Rv3602c	4045210-	-	TIPAFHPGELNVYSAPGDVADVSR	MTIPAFHPGELNVYSAPGDVADVSRALR	M	ATG	4045210	0	0	no
Rv3672c	4114342-	-	SAGGTPLQAGATPTGSR	MSAGGTPLQAGATPTGSRGTVALR	M	ATG	4114342	0	0	no
Rv3716c	4160913-	-	MQPGGDMSALLAQAQQMQQK	MQPGGDMSALLAQAQQMQQKLLEAQQQLANSEVHGQAGGGLVK	M	ATG	4160913	0	0	no
Rv3783	4229258+	+	TFMDAQASFQTQSR	MTFMDAQASFQTQSRTLAR	M	ATG	4229258	0	0	no
Rv3800c	4261146-	-	ADVAESQENAPAER	MADVAESQENAPAERAELTVPEMR	M	ATG	4261146	0	0	no
Rv3842c	4315562-	-	TWADEVLAGHPFVVAHR	MTWADEVLAGHPFVVAHRGASAAR	M	ATG	4315562	0	0	no
Rv3865	4341566+	+	TGFLGVVPSFLK	MTGFLGVVPSFLKVLAGMHNEIVGDIK	M	ATG	4341566	0	0	no
Rv3881c	4361925-	-	TQSQTVTVDQQEILNR	MTQSQTVTVDQQEILNRANEVEAPMADPPTDVPITPCELTAAK	M	ATG	4361925	0	0	no
Rv3910	4396597+	+	MRPSPGEVPTASQR	MRPSPGEVPTASQR	M	ATG	4396597	0	0	no
Rv2732c	3044986-	-	SHEHDAGDLDALR	MSHEHDAGDLDALRAEIEAAER	M	ATG	3044986	3	0.00488599	no
Rv0208c	248888-	-	HAQPGVGLRPDTPVASGQLPSTSIR	MHAQPGVGLRPDTPVASGQLPSTSIR	M	ATG	248888	18	0.022756	no
Rv2339	2614714+	+	SDTPSGPHPIIPR	MSDTPSGPHPIIPRTIR	M	ATG	2614714	21	0.00727147	no
Rv3273	3654661+	+	STAVNSCTEAPASR	MSTAVNSCTEAPASRSQWMLANLR	M	ATG	3654661	24	0.0104621	no
Rv1510	1701343+	+	TDVGATAAPTGPIAR	MTDVGATAAPTGPIARGSVAR	M	ATG	1701343	48	0.03698	no
Rv1285	1437978+	+	TSDVTVGPAPGQYQLSHLR	MTSDVTVGPAPGQYQLSHLRLLEAEAIHVIR	M	ATG	1437978	69	0.0691383	no
Rv1637c	1843575-	-	TTVDDNYTGHVER	MTTVDDNYTGHVERGK	M	ATG	1843575	117	0.147355	no
Rv3034c	3394756-	-	TTMWGAPLHR	MTTMWGAPLHRR	M	ATG	3394756	165	0.182927	no	LL +2
Rv1099c	1228312-	-	MTNAISVLAVADR	MTNAISVLAVADRGTMFDPSAVFYMNK	M	ATG	1228312	270	0.273834	no
Rv1280c	1432765-	-	MFAGNGMLLPASMTATPEAFNK	MFAGNGMLLPASMTATPEAFNKGQLDGPGPSAGPFVVSALDR	M	ATG	1432765	675	0.380282	no
Rv2051c	2308976-	-	TTGQPAPPAPGNRPSQR	MTTGQPAPPAPGNRPSQR	M	ATG	2308976	1779	0.677973	no
Rv2402	2698415+	+	VLHAQPPDQSTETAR	MVLHAQPPDQSTETAREAK	M	ATG	2698415	-114	-0.0591286	yes	LL +1
Rv2720	3031788+	+	MNDSNDTSVAGGAAGADSR	MNDSNDTSVAGGAAGADSRVLSADSALTER	M	ATG	3031788	-57	-0.0872894	yes	LL +1
Rv3760	4205487+	+	TSNPSSSADQPLSGTTVPGSVPGK	MTSNPSSSADQPLSGTTVPGSVPGKAPEEPPVK	M	ATG	4205487	-51	-0.168874	yes	LL +1
Rv1399c	1575809-	-	TEPTVARPDIDPVLK	MTEPTVARPDIDPVLK	M	ATG	1575809	0	0	yes	LL +1
Rv1820	2064799+	+	STDTAPAQTMHAGR	MSTDTAPAQTMHAGRLIAR	M	ATG	2064799	0	0	yes	LL +1
Rv1822	2069080+	+	MEPVLTQNR	MEPVLTQNRVLTVPNMLSVIR	M	ATG	2069080	0	0	yes	LL +1
Rv1862	2109544+	+	VSPATTATMSAWQVR	MVSPATTATMSAWQVRR	M	ATG	2109544	0	0	yes	LL +1
Rv3463	3880907+	+	TNCAAGKPSSGPNLGR	MTNCAAGKPSSGPNLGR	M	ATG	3880907	0	0	yes	LL +1
Rv3678A	4118691-	-	TQPTAWEYATVPLLTHATK	MTQPTAWEYATVPLLTHATKQILDQWGADGWELVAVLPGPTGEQHVAYLK	M	ATG	4118691	0	0	yes	LL +1
Rv3699	4142044+	+	TDEVMDWDSAYR	MTDEVMDWDSAYREQGAFEGPPPWNIGEPQPELATLIAAGK	M	ATG	4142044	0	0	yes	LL +1
Rv0503c	594779-	-	TSQGDTTSGTQLKPPVEAVR	MTSQGDTTSGTQLKPPVEAVR	M	ATG	594779	0	0	yes	LL +1
Rv0580c	677616-	-	TDQSYAVDIAHPPAALLR	MTDQSYAVDIAHPPAALLRLVNPILR	M	ATG	677616	0	0	yes	LL +1
Rv3706c	4149902-	-	SETSETPTPPPHQTPK	MSETSETPTPPPHQTPKVFK	M	ATG	4149902	9	0.028125	yes	LL +1
Rv0314c	383514-	-	MNPEDDPEAR	MNPEDDPEARIR	M	ATG	383514	27	0.0407855	yes	LL +1
Rv1326c	1492417-	-	TSASTQHGQSPTSSTCQPCPTR	MTSASTQHGQSPTSSTCQPCPTRAETR	I	ATT	1492417	-105	-0.047836	no
Rv0032	34202+	+	MDTDNDRPTLAR	MDTDNDRPTLAR	V	GTG	34202	-93	-0.0401728	no
Rv3316	3704030+	+	MNTTATTVSR	MNTTATTVSRGR	V	GTG	3704030	-72	-0.213018	no
Rv1248c	1393052-	-	ANISSPFGQNEWLVEEMYR	MANISSPFGQNEWLVEEMYRK	V	GTG	1393052	-51	-0.0139956	no
Rv1612	1811091+	+	MMTDLSTPDLPR	MMTDLSTPDLPRMSAAIAEPTSHDPDSGGHFGGPSGWGGR	V	GTG	1811091	-36	-0.0292208	no
Rv1416	1591671+	+	MKGGAGVPDLPSLDASGVR	MKGGAGVPDLPSLDASGVR	V	GTG	1591671	-18	-0.0387931	no
Rv0391	469998+	+	METGMTDESSVR	METGMTDESSVRTPK	V	GTG	469998	-12	-0.00983607	no
Rv1496	1686878+	+	AMMAASHDDDTVDGLATAVR	MAMMAASHDDDTVDGLATAVRGGDR	V	GTG	1686878	-6	-0.0059761	no
Rv0702	801459+	+	MMAAQEQK	MMAAQEQKTLK	V	GTG	801459	-3	-0.00447094	no
Rv0103c	122173-	-	AAPVVGDADLQSVRR	MAAPVVGDADLQSVRR	V	GTG	122173	0	0	no
Rv0167	196861+	+	TTSTTLGGYVR	MTTSTTLGGYVRDQLQTPLTLVGGFFR	V	GTG	196861	0	0	no
Rv0178	208938+	+	MEDQQSASGDLTQK	MEDQQSASGDLTQKSVANGESTDTASAATEGHR	V	GTG	208938	0	0	no
Rv0201c	238395-	-	TLAAEPHPAPPQQPTVAWSEPDVDR	MTLAAEPHPAPPQQPTVAWSEPDVDRR	V	GTG	238395	0	0	no
Rv0245	296005+	+	MNSTNNLTPSSLR	MNSTNNLTPSSLREAFGHFPTGVVAIAAEVDGVR	V	GTG	296005	0	0	no
Rv0351	421709+	+	TDGNQKPDGNSGEQVTVTDK	MTDGNQKPDGNSGEQVTVTDK	V	GTG	421709	0	0	no
Rv0389	468335+	+	MIDGWTEEQHEPTVR	MIDGWTEEQHEPTVRHER	V	GTG	468335	0	0	no
Rv0412c	499619-	-	TVELAHPSTEPLGSR	MTVELAHPSTEPLGSRSPAEPAHPR	V	GTG	499619	0	0	no
Rv0598c	697567-	-	MKPPLAVDTSVAIPLLVR	MKPPLAVDTSVAIPLLVR	V	GTG	697567	0	0	no
Rv0668	763370+	+	MLDVNFFDELR	MLDVNFFDELRIGLATAEDIR	V	GTG	763370	0	0	no
Rv0732	824800+	+	MLSAFISSLR	MLSAFISSLRTVDLR	V	GTG	824800	0	0	no
Rv0738	830062+	+	MDPLMAHQR	MDPLMAHQRAQDAFAALLANVR	V	GTG	830062	0	0	no
Rv0813c	908018-	-	SSGAGSDATGAGGVHAAGSGDR	MSSGAGSDATGAGGVHAAGSGDRAVAAAVER	V	GTG	908018	0	0	no
Rv0877	976075+	+	TGPTEESAVATVADWPEGLAAVLR	MTGPTEESAVATVADWPEGLAAVLRGAADQAR	V	GTG	976075	0	0	no
Rv1193	1335794+	+	MLLASLNPAVVSAADIADAVR	MLLASLNPAVVSAADIADAVRIDGDVLSR	V	GTG	1335794	0	0	no
Rv1239c	1383042-	-	MFPGFDALPEVLRPVAR	MFPGFDALPEVLRPVAR	V	GTG	1383042	0	0	no
Rv1293	1448028+	+	MNELLHLAPNVWPR	MNELLHLAPNVWPRNTTR	V	GTG	1448028	0	0	no
Rv1297	1453204+	+	TDTDLITAGESTDGKPSDAAATD	MTDTDLITAGESTDGKPSDAAATDPPDLNADEPAGSLATMVLPELR	V	GTG	1453204	0	0	no
Rv1389	1564401+	+	SVGEGPDTKPTAR	MSVGEGPDTKPTAR	V	GTG	1564401	0	0	no
Rv1449c	1630199-	-	TTLEEISALTRPR	MTTLEEISALTRPR	V	GTG	1630199	0	0	no
Rv1591	1791570+	+	TEPPGFGGPSEPSGAPR	MTEPPGFGGPSEPSGAPRTSR	V	GTG	1791570	0	0	no
Rv1672c	1898207-	-	ATIAASPTHNALGK	MATIAASPTHNALGKAAR	V	GTG	1898207	0	0	no
Rv1766	1999737+	+	MIGDQDSIAAVLNR	MIGDQDSIAAVLNRLR	V	GTG	1999737	0	0	no
Rv1825	2071036+	+	SENRPEPVAAETSAATTAR	MSENRPEPVAAETSAATTAR	V	GTG	2071036	0	0	no
Rv2037c	2283721-	-	MALVSTARVDLVCEGGGVR	MALVSTARVDLVCEGGGVR	V	GTG	2283721	0	0	no
Rv2153c	2413351-	-	MKDTVSQPAGGR	MKDTVSQPAGGR	V	GTG	2413351	0	0	no
Rv2155c	2416394-	-	MLDPLGPGAPVLVAGGR	MLDPLGPGAPVLVAGGRVTGQAVAAVLTR	V	GTG	2416394	0	0	no
Rv2344c	2623752-	-	SASEHDPYDDFDR	MSASEHDPYDDFDRQR	V	GTG	2623752	0	0	no	LL +2
Rv2348c	2626980-	-	MLLPLGPPLPPDAVVAK	MLLPLGPPLPPDAVVAKR	V	GTG	2626980	0	0	no
Rv2426c	2724183-	-	TVPARPTPLFADIADVSR	MTVPARPTPLFADIADVSR	V	GTG	2724183	0	0	no
Rv2455c	2756704-	-	MDPNGSGAGPESHDAAFHAAPDR	MDPNGSGAGPESHDAAFHAAPDRQR	V	GTG	2756704	0	0	no
Rv2460c	2763175-	-	MNSQNSQIQPQAR	MNSQNSQIQPQARYILPSFIEHSSFGVK	V	GTG	2763175	0	0	no
Rv2462c	2765291-	-	MKSTVEQLSPTR	MKSTVEQLSPTR	V	GTG	2765291	0	0	no
Rv2506	2821712+	+	TASAPDGRPGQPEATNR	MTASAPDGRPGQPEATNR	V	GTG	2821712	0	0	no
Rv2727c	3040769-	-	MRPLAIIGPTGAGK	MRPLAIIGPTGAGK	V	GTG	3040769	0	0	no
Rv2750	3062816+	+	MIDRPLEGK	MIDRPLEGK	V	GTG	3062816	0	0	no
Rv2860c	3173000-	-	TGPGSPPLAWTELER	MTGPGSPPLAWTELERLVAAGDVDTVIVAFTDMQGR	V	GTG	3173000	0	0	no
Rv2868c	3180531-	-	TVGLGMPQPPAPTLAPR	MTVGLGMPQPPAPTLAPRR	V	GTG	3180531	0	0	no
Rv2881c	3191621-	-	TTNDAGTGNPAEQPAR	MTTNDAGTGNPAEQPARGAK	V	GTG	3191621	0	0	no
Rv3049c	3411083-	-	SIADTAAKPSTPSPANQPPVR	MSIADTAAKPSTPSPANQPPVR	V	GTG	3411083	0	0	no
Rv3149	3514657+	+	TQPPGQPVFIR	MTQPPGQPVFIRLGPPPDEPNQFVVEGAPR	V	GTG	3514657	0	0	no
Rv3302c	3689442-	-	SNPIQAPDGGQGWPAAALGPAQR	MSNPIQAPDGGQGWPAAALGPAQRAVAWK	V	GTG	3689442	0	0	no
Rv3365c	3777501-	-	TMFARPTIPVAAAASDISAPAQPAR	MTMFARPTIPVAAAASDISAPAQPAR	V	GTG	3777501	0	0	no
Rv3493c	3911675-	-	AADTGVAGGQQSTTR	MAADTGVAGGQQSTTRR	V	GTG	3911675	0	0	no
Rv3628	4067423+	+	MQFDVTIEIPK	MQFDVTIEIPKGQR	V	GTG	4067423	0	0	no
Rv3722c	4168128-	-	SFDSLSPQELAALHAR	MSFDSLSPQELAALHARHQQDYAALQGMK	V	GTG	4168128	0	0	no
Rv3799c	4255948-	-	TVTEPVLHTTAEK	MTVTEPVLHTTAEKLAELR	V	GTG	4255948	0	0	no
Rv3820c	4285825-	-	MFSITTLR	MFSITTLRDWTPDPGSIICWHASPTAK	V	GTG	4285825	0	0	no
Rv1683	1907597+	+	MDLNFSMVTRPIER	MDLNFSMVTRPIER	V	GTG	1907597	3	0.00100033	no
Rv2520c	2837612-	-	MDRDPNTIK	MDRDPNTIK	V	GTG	2837612	3	0.0132159	no
Rv1856c	2104817-	-	MEVLVTGGDTDLGR	MEVLVTGGDTDLGRTMAEGFR	V	GTG	2104817	6	0.00886263	no
Rv0553	644499+	+	MLPPLEALLDR	MLPPLEALLDRLYVVALPMR	V	GTG	644499	9	0.00918367	no
Rv0757	851629+	+	TAGTPGENTTPEAR	MTAGTPGENTTPEARVLVVDDEANIVELLSVSLK	V	GTG	851629	21	0.0282638	no
Rv0282	342163+	+	MERDDIGMVAASPVASR	MERDDIGMVAASPVASR	V	GTG	342163	33	0.0174142	no
Rv2584c	2910867-	-	MLNVIATGLSLK	MLNVIATGLSLKAR	V	GTG	2910867	33	0.0491803	no
Rv0131c	159619-	-	MWDFETDPQYQSK	MWDFETDPQYQSKLDWVEK	V	GTG	159619	39	0.0290395	no
Rv2158c	2420554-	-	MEAAPTGLRPNAVVGVR	MEAAPTGLRPNAVVGVR	V	GTG	2420554	54	0.033603	no
Rv2239c	2511598-	-	VAADHASNYAR	MVAADHASNYARK	V	GTG	2511598	54	0.113445	no
Rv0186	216359+	+	MPMCAGYVPGIPRLGVPALLMSDAG	MPMCAGYVPGIPRLGVPALLMSDAGLGVTNPGYR	V	GTG	216359	90	0.0433735	no
Rv3485c	3905452-	-	MQLSFQDR	MQLSFQDRTYLVTGGGSGIGK	V	GTG	3905452	114	0.120763	no
Rv3668c	4110145-	-	MAVFNGFAINGIGPD	MAVFNGFAINGIGPDPSFGQIACKQGR	V	GTG	4110145	336	0.481375	no
Rv1464	1651980+	+	MTDDGRIDLDSL	MTDDGRIDLDSLYLDDR	V	GTG	1651980	462	0.368715	no
Rv2338c	2613475-	-	MDKFVAFIAGIAPSA	MDKFVAFIAGIAPSATHR	V	GTG	2613475	588	0.615063	no
Rv3396c	3812791-	-	MREELTAAGLDNQIW	MREELTAAGLDNQIWQCPVVLLADVR	V	GTG	3812791	1287	0.816107	no
Rv1638	1846459+	+	MIKTSDWIIDLGPEGGAGG	MIKTSDWIIDLGPEGGAGGGTVVAQGTPEDVAAVPASYTGK	V	GTG	1846459	2718	0.93146	no
Rv3350c	3757688-	-	MNPVTVLNIGLANVG	MNPVTVLNIGLANVGSHNAGFGNVGEVNLGAANLGAHNLGFGNIGAGNLGFGNIGHGNVGVGNSGLTAGVPGLGNVGLGNAGGNNWGLANVGVGNIGLANTGTGNIGIGLTGDYQTGIGGLNSGAGNLGLFNSGAGNVGFFNTGTGNFGLFNSGSFNTGVGNSGTGSTGLFNAGSFNTGVANAGSYNTGSFNVGDTNTGGFNPGSINTGWLNAGNANTGVANAGNVNTGAFVTGNFSNGILWRGDYQGLAGFAVGYTLPLFPAVGADVSGGIGPITVLPPIHIPPIPVGFAAVGGIGPIAIPDISVPSIHLGLDPAVHVGSITVNPITVR	V	GTG	3757688	9414	0.844305	no
Rv2680	2996003+	+	TSAGDDAERSDEEER	MTSAGDDAERSDEEER	V	GTG	2996003	-102	-0.161392	yes	LL +1
Rv1633	1837012+	+	AFATEHPVVAHSEYR	MAFATEHPVVAHSEYRAVEEIVR	V	GTG	1837012	-63	-0.0300573	yes	LL +1
Rv2448c	2750255-	-	TASPHPAADMLPK	MTASPHPAADMLPKSWDPAAMESAIYQK	V	GTG	2750255	-30	-0.0114068	yes	LL +1
Rv3102c	3471372-	-	MMITLDHVTK	MMITLDHVTKQYK	V	GTG	3471372	-3	-0.00435414	yes	LL +1
Rv0921	1027104+	+	MNLADWAESVGVNR	MNLADWAESVGVNRHTAYR	V	GTG	1027104	0	0	yes	LL +1
Rv0956	1067561+	+	MQEPLRVPPSAPAR	MQEPLRVPPSAPAR	V	GTG	1067561	0	0	yes	LL +1
Rv1263	1410431+	+	MDPTDLAFAGAAAQAR	MDPTDLAFAGAAAQARMLADGALTAPMLLEVYLQR	V	GTG	1410431	0	0	yes	LL +1
Rv1292	1446379+	+	MTPADLAELLK	MTPADLAELLKATAAAVLAER	V	GTG	1446379	0	0	yes	LL +1
Rv1483	1673440+	+	TATATEGAKPPFVSR	MTATATEGAKPPFVSR	V	GTG	1673440	0	0	yes	LL +1
Rv2061c	2317085-	-	MTPTFSDLAEAQYLLLTTFTK	MTPTFSDLAEAQYLLLTTFTKDGR	V	GTG	2317085	0	0	yes	LL +1
Rv2073c	2330963-	-	MDDTGAAPVVIFGGR	MDDTGAAPVVIFGGRSQIGGELAR	V	GTG	2330963	0	0	yes	LL +1
Rv2141c	2401722-	-	TDETGASSDHSDDVAQVVSR	MTDETGASSDHSDDVAQVVSRLIR	V	GTG	2401722	0	0	yes	LL +1
Rv2193	2456901+	+	TSAVGTSGTAITSR	MTSAVGTSGTAITSRVHSLNR	V	GTG	2456901	0	0	yes	LL +1
Rv2294	2565327+	+	MIPNPLEELTLEQLR	MIPNPLEELTLEQLRSQR	V	GTG	2565327	0	0	yes	LL +1
Rv2363	2644320+	+	VGASGSDAGAISGSGNQR	MVGASGSDAGAISGSGNQRLPTLTDLLYQLATR	V	GTG	2644320	0	0	yes	LL +1
Rv2616	2945330+	+	MDLNALADLPLTYPEVGATATGR	MDLNALADLPLTYPEVGATATGRLPAGYNHLDVSTQIGTGR	V	GTG	2945330	0	0	yes	LL +1
Rv2753c	3067124-	-	TTVGFDVAAR	MTTVGFDVAARLGTLLTAMVTPFSGDGSLDTATAAR	V	GTG	3067124	0	0	yes	LL +1
Rv2916c	3226285-	-	MFESLSDR	MFESLSDRLTAALQGLR	V	GTG	3226285	0	0	yes	LL +1
Rv3661	4099647+	+	TVSDSPAQR	MTVSDSPAQRQTPPQTPGGTAPR	V	GTG	4099647	0	0	yes	LL +1
Rv3694c	4137114-	-	MDVDAFLLTNR	MDVDAFLLTNRGTWDR	V	GTG	4137114	0	0	yes	LL +1
Rv3747	4196724+	+	MILTGAFLADAAAAVDNK	MILTGAFLADAAAAVDNKLNVQGGVLSR	V	GTG	4196724	0	0	yes	LL +1
Rv3761c	4206917-	-	TSVDRLDGLDLGALDR	MTSVDRLDGLDLGALDR	V	GTG	4206917	0	0	yes	LL +1
Rv0041	43562+	+	TESPTAGPGGVPR	MTESPTAGPGGVPRADDADSDVPR	V	GTG	43562	0	0	yes	LL +1
Rv3888c	4372706-	-	TNPWNDPNMLDDGAIGR	MTNPWNDPNMLDDGAIGRGDPSVR	V	GTG	4372706	0	0	yes	LL +1
Rv0479c	568967-	-	TNPQGPPNDPSPWAR	MTNPQGPPNDPSPWARPGDQGPLAR	V	GTG	568967	0	0	yes	LL +1
Rv0554	645467+	+	MINLAYDDNGTGDPVVFIAGR	MINLAYDDNGTGDPVVFIAGRGGAGR	V	GTG	645467	0	0	yes	LL +1
Rv0613c	709515-	-	AEAFDATQAVAR	MAEAFDATQAVARILAEHGPLSEDDIAR	V	GTG	709515	0	0	yes	LL +1
Rv1192	1334939+	+	MLEPADRPCDAPGWFLYLTDIPR	MLEPADRPCDAPGWFLYLTDIPR	V	GTG	1334939	12	0.0145103	yes	LL +1
Rv1556	1761009+	+	TQIADRPTDPSPWSPR	MTQIADRPTDPSPWSPR	V	GTG	1761009	12	0.0197368	yes	LL +1
Rv0009	12486+	+	TNSPLATATATLHTNR	MTNSPLATATATLHTNRGDIK	V	GTG	12486	18	0.0328467	yes	LL +1
Rv2746c	3059201-	-	SAQPETGQIAGR	MSAQPETGQIAGRAR	V	GTG	3059201	30	0.0476948	yes	LL +1
Rv2211c	2477145-	-	SDVPELIHGPLEDR	MSDVPELIHGPLEDRHR	V	GTG	2477145	36	0.0316067	yes	LL +1
Rv3624c	4063856-	-	TQSSSAITPGQTAELYPGDIK	MTQSSSAITPGQTAELYPGDIKSVLLTAEQIQAR	V	GTG	4063856	48	0.0738462	yes	LL +1
Rv0182c	214026-	-	SVLAENSGREPADER	MSVLAENSGREPADER	V	GTG	214026	114	0.102518	yes	LL +1
Rv2232	2506428+	+	TDTTASGTNCPPPPR	MTDTTASGTNCPPPPRAAAR	V	GTG	2506428	150	0.171429	yes	LL +1
Rv1118c	1242669-	-	MDPSTLALDR	MDPSTLALDRALNETR	V	GTG	1242669	162	0.188372	yes	LL +1
Rv2529	2853316+	+	MELLVAANPAEDSR	MELLVAANPAEDSRLPYLIR	V	GTG	2853316	441	0.317038	yes	LL +1
Rv3486	3905730+	+	AITGSAAPSWPR	MAITGSAAPSWPRLLHAEGPPSVICIR	L	TTG	3905730	-42	-0.0935412	no
Rv3790	4235773+	+	TMLSVGATTTATR	MTMLSVGATTTATRLTGWGR	L	TTG	4235773	-6	-0.00433213	no
Rv0166	194993+	+	TAQLASHLTR	MTAQLASHLTRALTLAQQQPYLAR	L	TTG	194993	0	0	no
Rv0250c	302028-	-	STTAELAELHDLVGGLRR	MSTTAELAELHDLVGGLRR	L	TTG	302028	0	0	no
Rv1301	1457558+	+	TETFDCADPEQR	MTETFDCADPEQRSR	L	TTG	1457558	0	0	no
Rv2569c	2894408-	-	SADSSLSLPLSGTHR	MSADSSLSLPLSGTHRYR	L	TTG	2894408	0	0	no
Rv3043c	3404921-	-	TAEAPPLGELEAIRPYPAR	MTAEAPPLGELEAIRPYPAR	L	TTG	3404921	0	0	no
Rv3228	3604726+	+	MRPGDYDESDVK	MRPGDYDESDVK	L	TTG	3604726	0	0	no
Rv3501c	3920861-	-	MIQQLAVPAR	MIQQLAVPARAVGGFFEMSMDTAR	L	TTG	3920861	0	0	no
Rv3877	4355007+	+	SAPAVAAGPTAAGATAARPATTR	MSAPAVAAGPTAAGATAARPATTR	L	TTG	4355007	0	0	no
Rv0201c	238389-	-	AAEPHPAPPQQPTVAWSEPDVDR	MAAEPHPAPPQQPTVAWSEPDVDRR	L	TTG	238389	6	0.0119284	no
Rv1363c	1535332-	-	MAAEAEAAEAEA	MAAEAEAAEAEALAAAARAR	L	TTG	1535332	60	0.0764331	no
Rv3437	3856986+	+	SNPYAQHQLK	MSNPYAQHQLKLIR	L	TTG	3856986	75	0.157563	no
Rv3863	4339215+	+	TFEVVRPSDSAAQHGR	MTFEVVRPSDSAAQHGR	L	TTG	4339215	366	0.310696	no
Rv1326c	1491436-	-	MPVAEHPFAGSW	MPVAEHPFAGSWGYQVTSYYAPTSRFGTPDDFR	L	TTG	1491436	876	0.399089	no
Rv0107c	127304-	-	MPQTTDAPSAEVLRAAAR	MPQTTDAPSAEVLRAAAR	L	TTG	127304	3237	0.660882	no
